# Supplementary material
Source: HighWire-hosted journal article supplement (doi:10.1101/rna.072959.119)
Supplement: Supplemental_Legends.docx [file Supplemental_Legends.docx]

**SUPPLEMENTARY DATA**

**Figure S1.** SYNCRIP binds to the pri-let-7a-1. **(A)** BLI data reporting on SYNCRIP binding to pri-let-7a (80 nM) at a protein concentration of 80 nM, 100 nM, 120 nM, respectively.

**Figure S2.** SYNCRIP is capable of regulating a set of miRNAs. **(A, B)** Real-time PCR analysis of SYNCRIP knockdown**(A)** or overexpression**(B)**. **(C-E)** Northern blot analysis of miR-26b-5p **(C)**, miR-15b-5p **(D)**, miR-16-5p **(E)** in response to SYNCRIP knockdown. **(F)** miRNA microarray analysis of 675 human miRNAs in SYNCRIP shRNA-treated sample compared with control shRNA-treated sample.

**Figure S3.** SYNCRIP associates with microprocessor complex. **(A, B)** Identification of the interaction of SYNCRIP with Dicer **(A)** and AGO2 **(B)** through Co-IP. Plasmid encoding Flag-Dicer or Flag-AGO2 was co-transfected with plasmid expressing myc, myc-eGFP or myc-SYNCRIP or myc-TRBP in HEK293 cells. The cell lysates were then subjected to affinity purification with anti-myc-coated beads. The immunoprecipitates were eluted and immunoblotted with indicated antibodies. myc-TRBP serves as positive control. **(C)** immunofluorescence analysis of the localization of full-length or mutants of SYNCRIP. HEK293 cells transfected with vector expressing indicated proteins with Flag tag were incubated with antibodies against Flag and stained with fluorescent secondary antibodies. Green, Flag-tagged mutants; Blue, nucleus. Scale bar, 25M. **(D)** Detection of interaction between the mutants from SYNCRIP and DGCR8 in HEK293 cells through Co-IP. myc-tagged WT, C-terminus truncated (C), C-terminal truncated with NLS (C-NLS), N-terminal truncated (N) forms of SYNCRIP was co-expressed with Flag-tagged DGCR8. The cell lysates were immunoprecipitated with anti-myc-coated beads which were then immunoblotted with antibodies against Flag. **(E)** Detection of endogenous SYNCRIP in the input or Flag immunoprecipitates, and the presense of Drosha and DGCR8 were confirmed by immunoblot against Flag tag. **(F)** Parallel *in vitro* proceesing assay was performed on pri-miR-181.

**Figure S4.** The terminal loop of pri-let-7a serves as binding site for SYNCRIP. **(A)** Gel filtration analysis of RRM2-3 or RRM2-3 in complex with RNAs. 21nt: UAGAAUUACAUCAAGGGAGAU; 10nt: UUUAGAAUUA.

**Figure S5.** The function of SYNCRIP mutants involved in pri-let-7a interaction and processing. **(A)** SDS-PAGE for purified SYNCRIP mutants expressed in *E. coli.* **(B)** Pri-let-7a incubated with indicated recombinant proteins in the absence of Drosha immunoprecipitates was used as negative controls for *in vitro* processing assay. In the absence of Drosha immunoprecipitates, recombinant proteins have no ability to produce pre-let-7a. **(C)** Quantification data of relative pre-let-7a regarding to *in vitro* processing assay in Figure 5D. Error bars were presented as mean ± SEM. **(D)** Detection of protein expression in HEK293 cells. The plasmids encoding respective proteins fused with Flag tag were transfected into HEK293 cells and the expression was detected by western blot against Flag. **(E)** Effect of transient transfection of indicated WT or mutants of SYNCRIP on the processing of pri-let-7a in HEK293 cells. Transfection of Flag epitope tag is the negative control.

**Figure S6.** Structure of RRM2-3 from SYNCRIP. **(A)** Sequence alignment of RRM3 with various RRMs from RNA binding proteins. The upper panel shows the secondary structure of RRM3.

**Table S1:** Sequences of Oligos used in this study

**Table S2:** miRNA microarray data of shctrl and shSYNCRIP samples

**Table S3:** Data Collection and Refinement statistics.

**Table S4:** Sequences of DNA templates used in this study
