# Supplementary material
Source: HighWire-hosted journal article supplement (doi:10.1101/rna.072959.119)
Supplement: Supplemental_Table_S1.xlsx [file Supplemental_Table_S1.xlsx]

## Sheet: Oligos
Table S1: Oligo sequences (5'-3') used in this study.
Real-time PCR primers used for the amplification of pri-miRNAs
Description	Forward primer	Reverse primer
pri-let-7a-1	CCTGGATGTTCTCTTCACTG	GCCTGGATGCAGACTTTTCT
pri-miR-130a	CAGGGACTGGGAGAAGGAGTG	CTGCTAACGAATGCTCTGACTT
pri-miR-3138	TTGGGGGTGTGGTAAGTCG	AGCTCACACTGTCCCCAAAT
pri-miR-181a	GGACACACCAGGACTTTCTCTTC	TTCAACCCACCGACAGCAATG
pri-miR-7-1	TGCAGCATTTCACACCTTACT	AGAAGAGTTCAAAAACCATTAGCA
pri-miR-454	GGCTTCCAGGAGGCTGATTT	AGTGTCTGATAAATCGCGCA
pri-miR-148a	CAATTCCCTTGAAGCGGGTG	TCAGGAGTCCACCAGGGTAA
pri-miR-4521	CGCATGGAAGAAGTCGGTCT	CCCTCCGCATCTCACTTCTC
pri-miR-19b	TGGTGGCCTGCTATTTCCTT	GGCCGAAGCTGGAGTTCTAC
pri-miR-1307	TCGTGGTAGATAGGCGGTCA	GGCAGCTTAATCTATAGTACCTGTG
Real-time PCR primers used for the amplication of mature-miRNAs:
mat-let-7a-5p RT	GTTGGCTCTGGTGCAGGGTCCGAGGTATTCGCACCAGAGCCAAC AACTAT
mat-let-7a-5p-F	TGTGTTGTGAGGTAGTAGGTTGT
mat-130a-3p RT	GTTGGCTCTGGTGCAGGGTCCGAGGTATTCGCACCAGAGCCAAC ATGCCC
mat-130a-3p-F	TGGGGCAGTGCAATGTTAAAA
mat-3138 RT	GTTGGCTCTGGTGCAGGGTCCGAGGTATTCGCACCAGAGCCAAC ACTCCC
mat-3138-F	TGTTTTTTTTGTGGACAGTGAGGTA
mat-181a-3p RT	GTTGGCTCTGGTGCAGGGTCCGAGGTATTCGCACCAGAGCCAAC GGTACA
mat-181a-3p-F	TGTTTGACCATCGACCGTTG
mat-7-5p RT	GTTGGCTCTGGTGCAGGGTCCGAGGTATTCGCACCAGAGCCAAC ACAACA
mat-7-5p-F	TGGGTGTGGAAGACTAGTGATTT
mat-454-3p RT	GTTGGCTCTGGTGCAGGGTCCGAGGTATTCGCACCAGAGCCAAC ACCCTA
mat-454-3p-F	GGTGTGGTAGTGCAATATTGCTTA
mat-148a-5p RT	GTTGGCTCTGGTGCAGGGTCCGAGGTATTCGCACCAGAGCCAAC AGTCGG
mat-148a-5p-F	TTGGGGAAAGTTCTGAGACACT
mat-4521 RT	GTTGGCTCTGGTGCAGGGTCCGAGGTATTCGCACCAGAGCCAAC CTGAGC
mat-4521-F	TGTTTTTTTGCTAAGGAAGTCCTGT
mat-19b-5p RT	GTTGGCTCTGGTGCAGGGTCCGAGGTATTCGCACCAGAGCCAAC GCTGGA
mat-19b-5p-F	TGTTTTTTTTTAGTTTTGCAGGTTTGC
universal reverse primer	GTGCAGGGTCCGAGGT
U6 RT	AACGCTTCACGAATTTGCGT
U6-F	CTCGCTTCGGCAGCACA
U6-R	AACGCTTCACGAATTTGCGT
3' biotynilated adaptor	ACTATCTATTCTCCC-biotin
Real-time PCR primers used for the amplication of mRNAs:
SYNCRIP-F	ATGAGCGAGATGGTGCTGTC
SYNCRIP-R	TTCTGATCTGGTGGCTTGGC
HMGA2-F	CTCAGCAGCAGTTGGATCTTT
HMGA2-R	TAAACCTGGGACTGTGAAGGG
EGFR-F	CGATGAGGCAGGTCAGTTGT
EGFR-R	GTGAGAACTATTTTGGGAAGCACA
GAPDH-F	TCAACGACCACTTTGTCAAGCTCA
GAPDH-R	GCTGGTGGTCCAGGGGTCTTACT
Northern blot probes
let-7a-5p	biotin-AACTATACAACCTACTACCTCA
miR-15b-5p	biotin-TGTAAACCATGATGTGCTGCTA
miR-16-1-5p	biotin-CGCCAATATTTACGTGCTGCTA
miR-26b-6p	biotin-ACCTATCCTGAATTACTTGAA
miR-7-5P	biotin-ACAACAAAATCACTAGTCTTCCA
miR-1307	biotin-CGAGCCGGTCGAGGTCCGGTCGAGATTG
tRSA probe	biotin-CGACTATCTTACGCACTTGCATGATTCTGG
let-7a-2 loop probe	biotin-GGCTGTACAGTTATCTCCCTTGATGTAATTCTAAA
U6 snRNA	biotin-GAATTTGCGTGTCATCCTT
RNA-IP primer
RIP-PCR-F	GCATTTTCATTTGTAGGAACTGTAAGAAAACCAGC
RIP-PCR-R	GCCTGGATGCAGACTTTTCT
SYNCRIP clone
FL-F	atggctacagaacatgttaatgg
FL-R	ctacttccactgttgcccaaaag
RRM1-F	tctgttggcactgagata
RRM2-F	aacaataggctttttgtgg
RRM2-R	atcttctataggatcagc
RRM3-F	gatcctgaggttatggca
RRM3-R	atacatttgattttttgctgc
