# Supplementary material
Source: HighWire-hosted journal article supplement (doi:10.1101/rna.072959.119)
Supplement: Supplemental_Table_S2.xlsx [file Supplemental_Table_S2.xlsx]

## Sheet: Sheet1
ProbeID	Transcript ID(Array Design)	2 siRNA1/-ve siRNA3.fc	2 siRNA1/-ve siRNA3.raw.pval
20519613	hsa-miR-4753-5p	2.62837	0.0673
20536712	hsa-miR-4455	2.19288	0.04088
20519651	hsa-miR-4773	1.97573	0.23
20518946	hsa-miR-4539	1.96097	0.0819
20515517	hsa-miR-3121-3p	1.91056	0.04443
20500156	hsa-miR-27a-5p	1.83768	0.0642
20500735	hsa-miR-130a-3p	1.80728	0.035
20501229	hsa-miR-371a-5p	1.7786	0.0272
20515602	hsa-miR-3174	1.77052	0.121
20515544	hsa-miR-3138	1.75889	0.037
20500461	hsa-miR-204-3p	1.74831	0.0817821
20506896	hsa-miR-664a-5p	1.66182	0.118
20519463	hsa-miR-4668-5p	1.6464	0.544
20500786	hsa-miR-184	1.62485	0.237339
20518431	hsa-miR-3910	1.62203	0.0678
20515579	hsa-miR-3158-5p	1.60231	0.206437
20500470	hsa-miR-181a-3p	1.59554	0.115
20504341	hsa-miR-601	1.58328	0.00305
20525727	hsa-miR-6883-5p	1.56359	0.104316
20522039	hsa-miR-5703	1.55121	0.118706
20519512	hsa-miR-4698	1.53023	0.200976
20518800	hsa-miR-4428	1.52346	0.248897
20519554	hsa-miR-4721	1.51919	0.250436
20504268	hsa-miR-551a	1.50342	0.365
20523008	hsa-miR-6076	1.45395	0.022
20529795	hsa-miR-8085	1.40114	0.115
20515587	hsa-miR-3163	1.3954	0.368
20500459	hsa-miR-203a	1.37723	0.406
20518623	hsa-miR-3935	1.36739	0.46
20500448	hsa-miR-181c-5p	1.32233	0.254
20529774	hsa-miR-8064	1.3161	0.333
20506873	hsa-miR-1276	1.31479	0.122
20521822	hsa-miR-5584-5p	1.303	0.492
20519461	hsa-miR-4667-5p	1.30102	0.103
20525659	hsa-miR-6849-5p	1.29655	0.107
20517943	hsa-miR-3682-3p	1.2957	0.0999
20504289	hsa-miR-551b-5p	1.2794	0.4
20519465	hsa-miR-219b-5p	1.27701	0.413
20518459	hsa-miR-3928-3p	1.27644	0.21
20500154	hsa-miR-26b-5p	1.26802	0.605
20529799	hsa-miR-8089	1.23643	0.0324
20518937	hsa-miR-4535	1.23311	0.545
20525701	hsa-miR-6870-5p	1.23157	0.236
20518446	hsa-miR-3921	1.22921	0.572
20500773	hsa-miR-134-5p	1.22704	0.232
20515647	hsa-miR-514b-5p	1.22665	0.562
20506014	hsa-miR-942-3p	1.22661	0.0567
20525523	hsa-miR-6781-5p	1.22309	0.134
20504299	hsa-miR-575	1.21774	0.409
20528735	hsa-miR-7706	1.21519	0.208
20519671	hsa-miR-4784	1.20509	0.286
20529781	hsa-miR-8071	1.20446	0.0733
20519664	hsa-miR-4436b-3p	1.19877	0.189
20500720	hsa-miR-23b-5p	1.19864	0.333
20520576	hsa-miR-5195-3p	1.19624	0.59
20500472	hsa-miR-214-3p	1.1957	0.514
20525625	hsa-miR-6832-5p	1.19354	0.403
20525531	hsa-miR-6785-5p	1.19227	0.217
20519570	hsa-miR-4728-5p	1.18582	0.125
20520208	hsa-miR-5006-5p	1.18243	0.0907
20517706	hsa-miR-4257	1.17787	0.474
20500485	hsa-miR-222-5p	1.17437	0.178
20515644	hsa-miR-3200-5p	1.17398	0.398
20510799	hsa-miR-1972	1.16811	0.0181
20519409	hsa-miR-4634	1.16585	0.15
20506715	hsa-miR-1183	1.16521	0.51
20515564	hsa-miR-3150a-5p	1.15899	0.451
20524034	hsa-miR-6124	1.15842	0.137
20501213	hsa-miR-365b-5p	1.15697	0.252
20525677	hsa-miR-6858-5p	1.1505	0.216
20515520	hsa-miR-3124-5p	1.14789	0.625
20515540	hsa-miR-3136-5p	1.14776	0.308
20526180	hsa-miR-7111-5p	1.14571	0.716
20525609	hsa-miR-6824-5p	1.14535	0.438
20525497	hsa-miR-6768-5p	1.14531	0.375
20518880	hsa-miR-4486	1.14387	0.134
20517936	hsa-miR-3679-5p	1.14349	0.236
20525733	hsa-miR-6886-5p	1.14279	0.544
20525394	hsa-miR-6722-3p	1.13913	0.075
20529136	hsa-miR-7844-5p	1.13612	0.657
20524250	hsa-miR-6165	1.13478	0.0356
20503819	hsa-miR-519e-5p	1.13277	0.53
20504396	hsa-miR-642a-3p	1.13238	0.447
20503105	hsa-miR-486-5p	1.13189	0.0129
20509229	hsa-miR-1910-3p	1.12993	0.531
20525623	hsa-miR-6831-5p	1.12681	0.304
20504332	hsa-miR-595	1.12617	0.172
20501161	hsa-miR-30c-1-3p	1.12536	0.459
20500795	hsa-miR-193a-5p	1.12064	0.174
20509227	hsa-miR-1909-3p	1.11846	0.634
20504572	hsa-miR-1301-3p	1.11841	0.299
20519494	hsa-miR-1343-5p	1.11832	0.349
20502130	hsa-miR-425-3p	1.11597	0.398
20518874	hsa-miR-4481	1.11469	0.519
20515645	hsa-miR-3200-3p	1.11407	0.239
20525653	hsa-miR-6846-5p	1.11404	0.379
20503100	hsa-miR-483-5p	1.114	0.533
20505801	hsa-miR-760	1.11236	0.453
20525613	hsa-miR-6826-5p	1.11106	0.677
20501209	hsa-miR-365a-5p	1.11095	0.505
20525621	hsa-miR-6830-5p	1.1105	0.689
20519533	hsa-miR-4710	1.11007	0.432
20501314	hsa-miR-346	1.10938	0.182
20525695	hsa-miR-6867-5p	1.10755	0.673
20518903	hsa-miR-2392	1.10653	0.277
20525603	hsa-miR-6821-5p	1.10592	0.512
20518425	hsa-miR-3180	1.10556	0.616
20525539	hsa-miR-6789-5p	1.10511	0.427
20506856	hsa-miR-1262	1.10509	0.261
20518862	hsa-miR-4476	1.10496	0.679
20500454	hsa-miR-187-5p	1.10313	0.715
20519525	hsa-miR-4707-5p	1.10309	0.268
20500465	hsa-miR-210-3p	1.10306	0.161
20517954	hsa-miR-3691-5p	1.10297	0.722
20525456	hsa-miR-6747-3p	1.10293	0.677
20519609	hsa-miR-4750-5p	1.10271	0.604
20503803	hsa-miR-494-3p	1.10203	0.574
20519589	hsa-miR-4739	1.10184	0.217
20502122	hsa-miR-422a	1.10166	0.375
20525741	hsa-miR-6890-5p	1.10102	0.514
20518826	hsa-miR-4449	1.10073	0.232
20504583	hsa-miR-766-3p	1.10055	0.295
20506012	hsa-miR-941	1.10044	0.194
20525418	hsa-miR-6728-5p	1.09823	0.357
20519701	hsa-miR-4800-5p	1.09784	0.439
20525511	hsa-miR-6775-5p	1.09706	0.279
20506818	hsa-miR-1290	1.09704	0.874
20529785	hsa-miR-8075	1.09641	0.398
20500777	hsa-miR-138-1-3p	1.09629	0.572
20525453	hsa-miR-6746-5p	1.09616	0.331
20519493	hsa-miR-4687-3p	1.09528	0.326
20525585	hsa-miR-6812-5p	1.09368	0.354
20525607	hsa-miR-6823-5p	1.09171	0.698
20506898	hsa-miR-1306-5p	1.0915	0.328
20503879	hsa-miR-502-5p	1.09065	0.835
20525448	hsa-miR-6743-5p	1.09039	0.354
20506839	hsa-miR-1247-3p	1.08999	0.502
20519405	hsa-miR-4632-5p	1.0899	0.123
20515634	hsa-miR-3193	1.08856	0.692
20525747	hsa-miR-6893-5p	1.08765	0.539
20512260	hsa-miR-2276-3p	1.08731	0.799
20526186	hsa-miR-7114-5p	1.08695	0.717
20517816	hsa-miR-3609	1.08678	0.454
20520568	hsa-miR-5189-5p	1.08658	0.15
20519474	hsa-miR-4674	1.08457	0.577
20515637	hsa-miR-3195	1.08356	0.506
20519457	hsa-miR-4665-5p	1.08345	0.387
20501282	hsa-miR-337-3p	1.08209	0.739
20525459	hsa-miR-6749-5p	1.08207	0.359
20515578	hsa-miR-3157-3p	1.08158	0.703
20517916	hsa-miR-3663-3p	1.08151	0.52
20503789	hsa-miR-491-5p	1.08148	0.197
20515608	hsa-miR-3179	1.08057	0.152
20503886	hsa-miR-505-5p	1.08046	0.286
20515623	hsa-miR-3187-3p	1.07967	0.351
20518802	hsa-miR-4430	1.0793	0.485
20504580	hsa-miR-769-5p	1.07901	0.364
20504564	hsa-miR-1296-5p	1.07825	0.501
20519576	hsa-miR-4732-5p	1.07716	0.67
20525535	hsa-miR-6787-5p	1.07655	0.767
20526174	hsa-miR-7108-5p	1.0758	0.475
20525396	hsa-miR-6724-5p	1.07575	0.521
20515560	hsa-miR-3147	1.07506	0.755
20525567	hsa-miR-6803-5p	1.07487	0.275
20518892	hsa-miR-4497	1.07439	0.258
20525561	hsa-miR-6800-5p	1.07436	0.53
20500791	hsa-miR-188-5p	1.07435	0.644
20525467	hsa-miR-6753-5p	1.07433	0.446
20515577	hsa-miR-3157-5p	1.07428	0.798
20517730	hsa-miR-4271	1.07401	0.728
20521785	hsa-miR-5100	1.07388	0.237
20519441	hsa-miR-4656	1.07348	0.662
20525661	hsa-miR-6850-5p	1.07338	0.395
20504391	hsa-miR-638	1.07329	0.394
20529770	hsa-miR-8060	1.07272	0.682
20505797	hsa-miR-873-3p	1.07242	0.61
20525543	hsa-miR-6791-5p	1.07205	0.516
20504582	hsa-miR-766-5p	1.07175	0.674
20509237	hsa-miR-1915-3p	1.07133	0.453
20522180	hsa-miR-5739	1.06992	0.383
20504297	hsa-miR-574-5p	1.06954	0.603
20519592	hsa-miR-4741	1.0695	0.514
20504187	hsa-miR-455-3p	1.06939	0.391
20514163	hsa-miR-2861	1.06902	0.53
20519636	hsa-miR-4763-3p	1.06756	0.527
20503876	hsa-miR-500a-3p	1.06681	0.215
20525681	hsa-miR-6769b-5p	1.06661	0.587
20525573	hsa-miR-6806-5p	1.06654	0.521
20518787	hsa-miR-4419a	1.06647	0.815
20525517	hsa-miR-6778-5p	1.06642	0.685
20525465	hsa-miR-6752-5p	1.06509	0.583
20504298	hsa-miR-574-3p	1.06497	0.556
20517736	hsa-miR-4281	1.06355	0.465
20506781	hsa-miR-1233-5p	1.06311	0.428
20517729	hsa-miR-4270	1.063	0.547
20507742	hsa-miR-1469	1.06207	0.448
20501158	hsa-miR-106b-3p	1.06144	0.405
20501312	hsa-miR-345-5p	1.0614	0.51
20500394	hsa-miR-197-5p	1.06013	0.487
20515624	hsa-miR-3188	1.05998	0.784
20525473	hsa-miR-6756-5p	1.05984	0.296
20506004	hsa-miR-935	1.05937	0.592
20505760	hsa-miR-708-5p	1.05861	0.26
20519498	hsa-miR-4690-5p	1.05773	0.448
20518904	hsa-miR-4507	1.05734	0.682
20525503	hsa-miR-6771-5p	1.05684	0.726
20520577	hsa-miR-5196-5p	1.05457	0.723
20525491	hsa-miR-6765-5p	1.05419	0.613
20511549	hsa-miR-2110	1.05402	0.596
20501201	hsa-miR-362-5p	1.05397	0.283
20502123	hsa-miR-423-5p	1.05373	0.587
20519600	hsa-miR-4745-5p	1.05281	0.347
20519681	hsa-miR-4788	1.05203	0.797
20500783	hsa-miR-150-3p	1.05144	0.832
20500450	hsa-miR-182-5p	1.05097	0.422
20529779	hsa-miR-8069	1.05067	0.551
20500848	hsa-miR-320a	1.05061	0.454
20504273	hsa-miR-92b-5p	1.0506	0.665
20500780	hsa-miR-149-5p	1.04959	0.429
20501237	hsa-miR-375	1.04883	0.678
20515638	hsa-miR-3196	1.04832	0.538
20517675	hsa-miR-378c	1.0482	0.159
20524035	hsa-miR-6125	1.04715	0.434
20503815	hsa-miR-498	1.04669	0.879
20506771	hsa-miR-1227-5p	1.04605	0.539
20524047	hsa-miR-6127	1.04579	0.563
20515563	hsa-miR-3149	1.04525	0.898
20529568	hsa-miR-7977	1.04489	0.633
20501278	hsa-miR-328-3p	1.04487	0.571
20501277	hsa-miR-328-5p	1.04471	0.752
20518629	hsa-miR-3940-5p	1.04443	0.604
20525571	hsa-miR-6805-5p	1.04416	0.783
20525691	hsa-miR-6865-5p	1.04384	0.859
20501177	hsa-miR-99b-3p	1.04351	0.649
20518851	hsa-miR-4466	1.04304	0.551
20504563	hsa-miR-320c	1.04245	0.463
20519429	hsa-miR-4649-5p	1.04168	0.809
20525475	hsa-miR-6757-5p	1.04126	0.885
20515550	hsa-miR-3141	1.04096	0.31
20501243	hsa-miR-378a-3p	1.04057	0.495
20500453	hsa-miR-183-3p	1.04053	0.762
20519497	hsa-miR-4689	1.04003	0.691
20525559	hsa-miR-6799-5p	1.03955	0.488
20525395	hsa-miR-6723-5p	1.03932	0.826
20515607	hsa-miR-3178	1.03869	0.665
20500158	hsa-miR-28-5p	1.03853	0.682
20503880	hsa-miR-502-3p	1.03761	0.431
20501242	hsa-miR-378a-5p	1.03702	0.621
20515627	hsa-miR-320e	1.03698	0.478
20504553	hsa-miR-671-3p	1.03695	0.744
20520198	hsa-miR-5001-5p	1.03678	0.685
20529131	hsa-miR-4433b-3p	1.03615	0.69
20500737	hsa-miR-132-3p	1.03559	0.412
20501176	hsa-miR-99b-5p	1.03552	0.593
20515617	hsa-miR-3185	1.03519	0.524
20500432	hsa-miR-139-5p	1.03486	0.791
20519433	hsa-miR-4651	1.03419	0.705
20506712	hsa-miR-1180-3p	1.03375	0.673
20525565	hsa-miR-6802-5p	1.03365	0.802
20525533	hsa-miR-6786-5p	1.03285	0.568
20517680	hsa-miR-4298	1.03267	0.604
20525577	hsa-miR-6808-5p	1.03234	0.84
20500781	hsa-miR-149-3p	1.03216	0.672
20501179	hsa-miR-296-3p	1.03203	0.686
20529137	hsa-miR-7845-5p	1.03146	0.677
20525426	hsa-miR-6732-5p	1.03098	0.859
20500469	hsa-miR-212-3p	1.03066	0.753
20519607	hsa-miR-4749-5p	1.03054	0.822
20523020	hsa-miR-6088	1.03042	0.763
20504325	hsa-miR-550a-3p	1.02983	0.649
20500174	hsa-miR-93-3p	1.02968	0.68
20500729	hsa-miR-124-3p	1.02924	0.874
20505791	hsa-miR-877-5p	1.02896	0.764
20506901	hsa-miR-1307-3p	1.0288	0.753
20504408	hsa-miR-652-3p	1.0286	0.574
20519580	hsa-miR-4734	1.02782	0.657
20504562	hsa-miR-320b	1.02617	0.703
20506801	hsa-miR-1207-5p	1.02595	0.735
20525416	hsa-miR-6727-5p	1.02578	0.739
20517821	hsa-miR-3613-3p	1.02512	0.974
20519467	hsa-miR-4669	1.02509	0.794
20504413	hsa-miR-663a	1.02501	0.795
20523018	hsa-miR-6086	1.0247	0.843
20525021	hsa-miR-6510-5p	1.02452	0.824
20506779	hsa-miR-1231	1.02412	0.775
20506787	hsa-miR-1237-5p	1.02409	0.835
20518839	hsa-miR-4459	1.02311	0.623
20504581	hsa-miR-769-3p	1.0225	0.698
20518852	hsa-miR-4467	1.02116	0.888
20525699	hsa-miR-6869-5p	1.02083	0.813
20522537	hsa-miR-5787	1.02076	0.798
20501298	hsa-miR-339-5p	1.02035	0.71
20501181	hsa-miR-130b-3p	1.02034	0.753
20517835	hsa-miR-3621	1.0202	0.885
20518882	hsa-miR-4488	1.01984	0.718
20518801	hsa-miR-4429	1.01948	0.81
20519679	hsa-miR-4787-5p	1.01946	0.695
20523019	hsa-miR-6087	1.01806	0.733
20503878	hsa-miR-501-3p	1.01784	0.789
20502124	hsa-miR-423-3p	1.01778	0.741
20517824	hsa-miR-3615	1.01742	0.894
20503884	hsa-miR-504-5p	1.01724	0.967
20504586	hsa-miR-762	1.017	0.802
20517919	hsa-miR-3665	1.01686	0.81
20518432	hsa-miR-3911	1.01683	0.873
20529139	hsa-miR-7847-3p	1.01612	0.846
20505787	hsa-miR-744-5p	1.01596	0.805
20526170	hsa-miR-7106-5p	1.01556	0.966
20500444	hsa-miR-181a-5p	1.01512	0.718
20501280	hsa-miR-342-3p	1.01484	0.749
20500148	hsa-miR-24-3p	1.01412	0.805
20506768	hsa-miR-1226-3p	1.01392	0.897
20525420	hsa-miR-6729-5p	1.01375	0.828
20500761	hsa-miR-191-5p	1.01365	0.603
20525721	hsa-miR-6880-5p	1.01337	0.952
20506882	hsa-miR-1281	1.0133	0.977
20528733	hsa-miR-7704	1.01147	0.798
20503875	hsa-miR-500a-5p	1.01111	0.846
20519048	hsa-miR-3960	1.01094	0.852
20523022	hsa-miR-6090	1.01065	0.891
20500755	hsa-miR-145-5p	1.01047	0.972
20500800	hsa-miR-206	1.00888	0.97
20526172	hsa-miR-7107-5p	1.00846	0.9
20505746	hsa-miR-874-3p	1.0084	0.934
20518936	hsa-miR-378i	1.00799	0.93
20503907	hsa-miR-532-5p	1.00759	0.895
20504274	hsa-miR-92b-3p	1.00736	0.849
20501197	hsa-miR-361-5p	1.00719	0.896
20500115	hsa-let-7b-5p	1.00658	0.927
20504584	hsa-miR-378d	1.00638	0.956
20504380	hsa-miR-629-3p	1.00587	0.899
20500130	hsa-miR-17-5p	1.00523	0.881
20504552	hsa-miR-671-5p	1.00519	0.963
20500194	hsa-miR-106a-5p	1.00466	0.838
20500173	hsa-miR-93-5p	1.00441	0.92
20518817	hsa-miR-4442	1.00326	0.98
20500191	hsa-miR-103a-3p	1.00307	0.93
20500133	hsa-miR-18a-3p	1.003	0.958
20523021	hsa-miR-6089	1.00249	0.976
20523006	hsa-miR-6074	1.00191	0.991
20517820	hsa-miR-3613-5p	1.00171	0.997
20506842	hsa-miR-1250-5p	1.00167	0.991
20506774	hsa-miR-1228-5p	1.00078	0.996
20503102	hsa-miR-484	-1.00012	0.999
20504569	hsa-miR-1271-5p	-1.00055	0.991
20525593	hsa-miR-6816-5p	-1.0006	0.997
20504357	hsa-miR-615-3p	-1.00237	0.97
20520351	hsa-miR-1273g-3p	-1.00266	0.964
20501292	hsa-miR-331-5p	-1.00285	0.987
20503908	hsa-miR-532-3p	-1.00342	0.974
20518782	hsa-miR-1268b	-1.00398	0.966
20506006	hsa-miR-937-5p	-1.00448	0.954
20500486	hsa-miR-222-3p	-1.00512	0.875
20525655	hsa-miR-6847-5p	-1.00517	0.973
20500418	hsa-miR-129-5p	-1.00542	0.97
20500484	hsa-miR-221-3p	-1.00546	0.867
20529782	hsa-miR-8072	-1.00606	0.967
20517745	hsa-miR-4286	-1.00688	0.964
20500171	hsa-miR-92a-3p	-1.00694	0.839
20500395	hsa-miR-197-3p	-1.00698	0.929
20506829	hsa-miR-1304-5p	-1.00725	0.979
20503807	hsa-miR-193b-5p	-1.00754	0.939
20525619	hsa-miR-6829-5p	-1.00956	0.958
20500121	hsa-let-7e-5p	-1.01006	0.869
20525684	hsa-miR-6861-5p	-1.01047	0.935
20506899	hsa-miR-1306-3p	-1.01065	0.94
20500765	hsa-miR-125a-5p	-1.0117	0.836
20524054	hsa-miR-6133	-1.01236	0.967
20515573	hsa-miR-3154	-1.0124	0.938
20500189	hsa-miR-29b-2-5p	-1.01292	0.878
20500446	hsa-miR-181b-5p	-1.01354	0.75
20504323	hsa-miR-589-3p	-1.015	0.785
20526885	hsa-miR-7162-3p	-1.01507	0.891
20509070	hsa-miR-320d	-1.01547	0.84
20502126	hsa-miR-424-3p	-1.01561	0.819
20526861	hsa-miR-7150	-1.01605	0.869
20500196	hsa-miR-107	-1.01611	0.556
20519439	hsa-miR-4655-5p	-1.01636	0.817
20500455	hsa-miR-187-3p	-1.01643	0.809
20500787	hsa-miR-185-5p	-1.01651	0.699
20505795	hsa-miR-665	-1.01682	0.89
20519488	hsa-miR-4684-3p	-1.01713	0.874
20519615	hsa-miR-371b-5p	-1.01806	0.833
20504379	hsa-miR-629-5p	-1.01848	0.738
20518905	hsa-miR-4508	-1.01907	0.898
20500758	hsa-miR-152-3p	-1.01923	0.866
20501276	hsa-miR-330-3p	-1.01925	0.845
20500119	hsa-let-7d-5p	-1.01943	0.662
20519626	hsa-miR-4758-5p	-1.01974	0.798
20529566	hsa-miR-7975	-1.0198	0.893
20501286	hsa-miR-151a-5p	-1.02066	0.522
20518722	hsa-miR-550b-2-5p	-1.02163	0.731
20525599	hsa-miR-6819-5p	-1.02253	0.884
20518894	hsa-miR-4419b	-1.02302	0.912
20504324	hsa-miR-550a-5p	-1.02428	0.846
20504433	hsa-miR-421	-1.0245	0.411
20515610	hsa-miR-3180-3p	-1.02482	0.875
20501295	hsa-miR-324-3p	-1.02554	0.785
20503882	hsa-miR-503-5p	-1.02588	0.64
20518878	hsa-miR-4484	-1.02605	0.637
20518845	hsa-miR-4463	-1.02628	0.664
20519507	hsa-miR-4695-5p	-1.02633	0.773
20525719	hsa-miR-6879-5p	-1.02685	0.78
20518935	hsa-miR-4534	-1.0272	0.871
20500139	hsa-miR-20a-5p	-1.0276	0.434
20500146	hsa-miR-23a-3p	-1.02762	0.294
20501299	hsa-miR-339-3p	-1.02769	0.758
20509224	hsa-miR-1908-5p	-1.02775	0.744
20500442	hsa-miR-34a-5p	-1.02864	0.631
20500721	hsa-miR-23b-3p	-1.02933	0.385
20518834	hsa-miR-4454	-1.02946	0.301
20500164	hsa-miR-31-5p	-1.02973	0.484
20503808	hsa-miR-193b-3p	-1.03062	0.469
20504559	hsa-miR-1224-5p	-1.03152	0.747
20501036	hsa-miR-200c-3p	-1.03236	0.629
20500150	hsa-miR-25-5p	-1.03268	0.631
20500766	hsa-miR-125a-3p	-1.03275	0.751
20500424	hsa-miR-30d-5p	-1.03277	0.68
20502129	hsa-miR-425-5p	-1.03342	0.663
20518913	hsa-miR-4516	-1.03388	0.643
20506887	hsa-miR-1292-5p	-1.03398	0.773
20500393	hsa-miR-196a-5p	-1.03425	0.751
20518794	hsa-miR-378g	-1.03474	0.844
20500132	hsa-miR-18a-5p	-1.0349	0.376
20512262	hsa-miR-2277-3p	-1.03659	0.881
20504431	hsa-miR-660-5p	-1.03741	0.74
20523017	hsa-miR-6085	-1.03837	0.759
20501293	hsa-miR-331-3p	-1.0384	0.664
20504375	hsa-miR-627-5p	-1.0395	0.875
20518818	hsa-miR-4443	-1.04058	0.643
20500152	hsa-miR-26a-5p	-1.04278	0.182
20526178	hsa-miR-7110-5p	-1.0431	0.342
20509228	hsa-miR-1910-5p	-1.04336	0.774
20506763	hsa-miR-1225-5p	-1.04461	0.83
20519588	hsa-miR-4738-3p	-1.04685	0.84
20525541	hsa-miR-6790-5p	-1.04696	0.829
20506872	hsa-miR-1275	-1.04879	0.639
20501252	hsa-miR-383-5p	-1.04883	0.386
20517679	hsa-miR-4299	-1.04884	0.842
20517810	hsa-miR-3605-5p	-1.04941	0.836
20501287	hsa-miR-151a-3p	-1.05079	0.225
20518887	hsa-miR-4492	-1.05129	0.809
20504394	hsa-miR-641	-1.05174	0.633
20518933	hsa-miR-4532	-1.05317	0.516
20517907	hsa-miR-3656	-1.05357	0.37
20518901	hsa-miR-4505	-1.05386	0.479
20518843	hsa-miR-3135b	-1.05492	0.649
20518625	hsa-miR-3937	-1.0561	0.699
20519518	hsa-miR-4701-3p	-1.05635	0.766
20506828	hsa-miR-1303	-1.05675	0.325
20518931	hsa-miR-4530	-1.05743	0.554
20504345	hsa-miR-605-5p	-1.05806	0.725
20515606	hsa-miR-3177-3p	-1.05884	0.679
20500452	hsa-miR-183-5p	-1.0592	0.48
20500746	hsa-miR-140-3p	-1.05944	0.434
20500725	hsa-miR-30b-3p	-1.06031	0.618
20501294	hsa-miR-324-5p	-1.0608	0.395
20504556	hsa-miR-550a-3-5p	-1.06111	0.295
20518721	hsa-miR-642b-3p	-1.06165	0.487
20525557	hsa-miR-6798-5p	-1.06407	0.396
20512263	hsa-miR-2278	-1.06435	0.821
20500170	hsa-miR-92a-1-5p	-1.065	0.343
20504407	hsa-miR-652-5p	-1.06567	0.506
20500445	hsa-miR-181a-2-3p	-1.06789	0.54
20500128	hsa-miR-16-5p	-1.0686	0.318
20500797	hsa-miR-194-5p	-1.07005	0.299
20501279	hsa-miR-342-5p	-1.07035	0.55
20517686	hsa-miR-4306	-1.07035	0.795
20519703	hsa-miR-4801	-1.07078	0.711
20515575	hsa-miR-3156-5p	-1.07133	0.685
20500743	hsa-miR-138-5p	-1.07453	0.435
20525549	hsa-miR-6794-5p	-1.07454	0.336
20515641	hsa-miR-3197	-1.07457	0.72
20518807	hsa-miR-4433-3p	-1.07475	0.565
20506776	hsa-miR-1229-5p	-1.07638	0.484
20518785	hsa-miR-4417	-1.07668	0.24
20504372	hsa-miR-625-5p	-1.07683	0.0539
20504434	hsa-miR-542-5p	-1.07695	0.606
20506813	hsa-miR-1285-3p	-1.0795	0.403
20518893	hsa-miR-4498	-1.07963	0.792
20500798	hsa-miR-195-5p	-1.07991	0.425
20519496	hsa-miR-4688	-1.08133	0.782
20525551	hsa-miR-6795-5p	-1.0829	0.71
20523000	hsa-miR-6068	-1.08301	0.667
20503877	hsa-miR-501-5p	-1.08394	0.0682
20500718	hsa-miR-15b-5p	-1.08548	0.401
20500144	hsa-miR-22-3p	-1.08645	0.376
20500440	hsa-miR-10b-5p	-1.0865	0.393
20518788	hsa-miR-378f	-1.08658	0.375
20524036	hsa-miR-6126	-1.0869	0.219
20525743	hsa-miR-6891-5p	-1.08711	0.206
20500112	hsa-let-7a-5p	-1.08714	0.342
20500117	hsa-let-7c-5p	-1.08715	0.235
20501157	hsa-miR-106b-5p	-1.089	0.02
20519595	hsa-miR-4743-5p	-1.0898	0.599
20500769	hsa-miR-126-3p	-1.09057	0.384
20517755	hsa-miR-500b-3p	-1.09269	0.391
20525430	hsa-miR-6734-5p	-1.0928	0.568
20526176	hsa-miR-7109-5p	-1.0934	0.455
20515585	hsa-miR-3162-5p	-1.09567	0.402
20504568	hsa-miR-1323	-1.09621	0.666
20525601	hsa-miR-6820-5p	-1.09704	0.51
20518920	hsa-miR-1269b	-1.09865	0.222
20517833	hsa-miR-3620-5p	-1.09919	0.267
20529773	hsa-miR-8063	-1.09954	0.663
20518819	hsa-miR-4444	-1.0998	0.578
20525499	hsa-miR-6769a-5p	-1.10015	0.221
20524053	hsa-miR-6132	-1.10234	0.618
20504378	hsa-miR-628-3p	-1.10326	0.148
20500151	hsa-miR-25-3p	-1.10476	0.274
20500157	hsa-miR-27a-3p	-1.10539	0.383
20515571	hsa-miR-3074-5p	-1.10562	0.506
20500778	hsa-miR-146a-5p	-1.10667	0.751
20500137	hsa-miR-19b-3p	-1.1083	0.496
20515591	hsa-miR-1260b	-1.10852	0.467
20500772	hsa-miR-129-2-3p	-1.10893	0.768
20500449	hsa-miR-181c-3p	-1.1096	0.383
20500159	hsa-miR-28-3p	-1.11197	0.142
20506865	hsa-miR-1268a	-1.11226	0.37
20525525	hsa-miR-6782-5p	-1.11252	0.583
20517902	hsa-miR-3651	-1.11307	0.3
20500733	hsa-miR-128-3p	-1.1134	0.273
20500767	hsa-miR-125b-2-3p	-1.11456	0.652
20529146	hsa-miR-7854-3p	-1.11546	0.628
20504561	hsa-miR-151b	-1.11882	0.305
20500181	hsa-miR-99a-5p	-1.11892	0.174
20503811	hsa-miR-181d-5p	-1.119	0.236
20503885	hsa-miR-504-3p	-1.12026	0.326
20519538	hsa-miR-4713-5p	-1.12168	0.202
20500385	hsa-miR-192-5p	-1.12469	0.286
20503887	hsa-miR-505-3p	-1.12497	0.314
20517899	hsa-miR-3648	-1.12501	0.029
20500723	hsa-miR-27b-3p	-1.12752	0.281
20519659	hsa-miR-4778-5p	-1.12818	0.533
20500183	hsa-miR-100-5p	-1.12949	0.31
20500478	hsa-miR-218-5p	-1.12983	0.669
20502235	hsa-miR-18b-5p	-1.13037	0.411
20500730	hsa-miR-125b-5p	-1.13076	0.109
20515531	hsa-miR-3130-5p	-1.13101	0.444
20517814	hsa-miR-3607-5p	-1.13104	0.545
20500438	hsa-miR-10a-5p	-1.13362	0.164
20525487	hsa-miR-6763-5p	-1.1354	0.14
20518895	hsa-miR-4499	-1.1354	0.507
20501771	hsa-miR-196b-5p	-1.13786	0.274
20500764	hsa-miR-9-3p	-1.14083	0.578
20501160	hsa-miR-29c-3p	-1.14245	0.742
20515603	hsa-miR-3175	-1.14302	0.214
20500422	hsa-miR-30c-5p	-1.14597	0.308
20520218	hsa-miR-5010-5p	-1.14619	0.346
20504364	hsa-miR-619-5p	-1.14671	0.19
20501296	hsa-miR-338-5p	-1.14851	0.502
20515618	hsa-miR-3065-5p	-1.1513	0.361
20500163	hsa-miR-30a-3p	-1.15698	0.118
20525735	hsa-miR-6887-5p	-1.15745	0.552
20500131	hsa-miR-17-3p	-1.15852	0.0205
20518881	hsa-miR-4487	-1.15907	0.518
20525386	hsa-miR-6511b-5p	-1.16091	0.585
20517717	hsa-miR-4327	-1.1635	0.6
20500161	hsa-miR-29a-3p	-1.16399	0.477
20501175	hsa-miR-301a-3p	-1.16422	0.611
20505789	hsa-miR-885-5p	-1.1645	0.485
20518940	hsa-miR-1587	-1.16461	0.0108
20529134	hsa-miR-6516-5p	-1.16513	0.531
20506866	hsa-miR-1269a	-1.16767	0.188
20500162	hsa-miR-30a-5p	-1.16803	0.188
20518842	hsa-miR-378h	-1.17097	0.477
20502237	hsa-miR-20b-5p	-1.17173	0.303
20501183	hsa-miR-30e-3p	-1.17438	0.342
20503786	hsa-miR-489-3p	-1.17665	0.527
20519425	hsa-miR-4646-5p	-1.17769	0.57
20525383	hsa-miR-6716-5p	-1.18516	0.0408
20506785	hsa-miR-1236-5p	-1.18826	0.324
20515526	hsa-miR-3127-5p	-1.19235	0.199
20525519	hsa-miR-6779-5p	-1.19247	0.146
20525515	hsa-miR-6777-5p	-1.1925	0.178
20505788	hsa-miR-744-3p	-1.19502	0.364
20518430	hsa-miR-3909	-1.20246	0.287
20500421	hsa-miR-148a-3p	-1.20467	0.245
20525024	hsa-miR-6511a-3p	-1.20711	0.176
20518783	hsa-miR-378e	-1.21149	0.329
20515562	hsa-miR-3148	-1.21392	0.439
20529132	hsa-miR-1273h-5p	-1.21406	0.471
20500126	hsa-miR-15a-5p	-1.2141	0.248
20500724	hsa-miR-30b-5p	-1.21577	0.343
20504322	hsa-miR-589-5p	-1.21707	0.433
20525513	hsa-miR-6776-5p	-1.22316	0.276
20500141	hsa-miR-21-5p	-1.22359	0.573
20500123	hsa-let-7f-5p	-1.22373	0.31
20500715	hsa-let-7i-5p	-1.22418	0.0238
20515572	hsa-miR-3074-3p	-1.22459	0.292
20525683	hsa-miR-6860	-1.22828	0.302
20525444	hsa-miR-6741-5p	-1.23073	0.037
20528493	hsa-miR-7641	-1.23177	0.0675
20518815	hsa-miR-4440	-1.2323	0.294
20526865	hsa-miR-7152-3p	-1.23284	0.571
20500441	hsa-miR-10b-3p	-1.2331	0.311
20500468	hsa-miR-212-5p	-1.24508	0.115
20505790	hsa-miR-885-3p	-1.24794	0.316
20504290	hsa-miR-551b-3p	-1.24818	0.532
20506823	hsa-miR-1295a	-1.24843	0.228
20523007	hsa-miR-6075	-1.25032	0.192
20506837	hsa-miR-1246	-1.25603	0.304
20515619	hsa-miR-3065-3p	-1.26194	0.374
20504588	hsa-miR-670-5p	-1.27021	0.204
20500439	hsa-miR-10a-3p	-1.27099	0.315
20500713	hsa-let-7g-5p	-1.2748	0.214
20517744	hsa-miR-4284	-1.27722	0.145
20518879	hsa-miR-4485	-1.27798	0.00859
20504337	hsa-miR-598-3p	-1.28151	0.594
20503814	hsa-miR-512-3p	-1.29307	0.0514
20520199	hsa-miR-5001-3p	-1.29481	0.0575
20519428	hsa-miR-4648	-1.29482	0.386
20500135	hsa-miR-19a-3p	-1.29799	0.316
20500745	hsa-miR-140-5p	-1.30282	0.351
20501180	hsa-miR-130b-5p	-1.30305	0.379
20500722	hsa-miR-27b-5p	-1.30858	0.0633
20503793	hsa-miR-146b-5p	-1.31474	0.284
20505803	hsa-miR-216b-5p	-1.31515	0.13
20503809	hsa-miR-497-5p	-1.32468	0.298
20501206	hsa-miR-363-3p	-1.32671	0.361
20500423	hsa-miR-30c-2-3p	-1.32862	0.135
20517903	hsa-miR-3652	-1.33351	0.273
20500796	hsa-miR-193a-3p	-1.34466	0.314
20500145	hsa-miR-23a-5p	-1.35723	0.256
20518914	hsa-miR-4517	-1.37234	0.149
20501182	hsa-miR-30e-5p	-1.3774	0.0726
20518841	hsa-miR-4461	-1.37874	0.0191
20506852	hsa-miR-1260a	-1.38077	0.357
20518853	hsa-miR-4468	-1.38624	0.151
20515598	hsa-miR-3173-3p	-1.38922	0.0711
20501291	hsa-miR-148b-3p	-1.39807	0.086
20525442	hsa-miR-6740-5p	-1.40429	0.0212
20525019	hsa-miR-6509-5p	-1.41233	0.349
20504329	hsa-miR-592	-1.41949	0.141
20528000	hsa-miR-7515	-1.43136	0.146
20506848	hsa-miR-1255a	-1.4486	0.0807
20525633	hsa-miR-6780b-5p	-1.46284	0.0757
20525627	hsa-miR-6833-5p	-1.47359	0.124
20523012	hsa-miR-6080	-1.49832	0.219
20522034	hsa-miR-5699-5p	-1.51972	0.0908
20500483	hsa-miR-221-5p	-1.52273	0.0206
20506005	hsa-miR-936	-1.5298	0.146
20504377	hsa-miR-628-5p	-1.53345	0.356
20521815	hsa-miR-5581-3p	-1.55126	0.0243
20525392	hsa-miR-6721-5p	-1.56181	0.328
20519689	hsa-miR-4793-3p	-1.56908	0.0265
20506795	hsa-miR-1202	-1.58805	0.03923
20518838	hsa-miR-4458	-1.58942	0.270913
20501772	hsa-miR-196b-3p	-1.59087	0.00251
20525450	hsa-miR-6744-5p	-1.59127	0.259
20525575	hsa-miR-6807-5p	-1.59653	0.137446
20518930	hsa-miR-4529-3p	-1.61284	0.0452
20505206	hsa-miR-765	-1.61895	0.141965
20518860	hsa-miR-4474-3p	-1.63827	0.0642
20525521	hsa-miR-6780a-5p	-1.64286	0.185
20502125	hsa-miR-424-5p	-1.65048	0.121
20517696	hsa-miR-4314	-1.66166	0.000814
20505799	hsa-miR-374b-5p	-1.68585	0.198861
20500136	hsa-miR-19b-1-5p	-1.68871	0.194
20506815	hsa-miR-1287-5p	-1.69588	0.0644
20525455	hsa-miR-6747-5p	-1.73567	0.119646
20510800	hsa-miR-1973	-1.74836	0.416
20500436	hsa-miR-7-1-3p	-1.77855	0.272
20515604	hsa-miR-3176	-1.7817	0.122
20506835	hsa-miR-1244	-1.8092	0.263
20518919	hsa-miR-4521	-1.85555	7.93e-06
20500420	hsa-miR-148a-5p	-1.87174	0.128
20519702	hsa-miR-4800-3p	-1.87634	0.139563
20500443	hsa-miR-34a-3p	-1.91918	0.0229
20520574	hsa-miR-5194	-1.95897	0.0546075
20519585	hsa-miR-3064-5p	-1.96354	0.0777
20504574	hsa-miR-454-3p	-2.04318	0.188
20521825	hsa-miR-5585-3p	-2.06784	0.0666
20506900	hsa-miR-1307-5p	-2.11997	0.00784
20500435	hsa-miR-7-5p	-2.42573	0.0415
