# Supplementary material
Source: HighWire-hosted journal article supplement (doi:10.1101/rna.072959.119)
Supplement: Supplemental_Table_S3.pdf [file Supplemental_Table_S3.pdf]

**Table S3: Data collection and refinement statistics.**

---

| <b>Data collection</b>      |                         |
|-----------------------------|-------------------------|
| X-ray generator             | Rigaku                  |
| Space group                 | H3                      |
| Cell dimensions             |                         |
| a, b, c (Å)                 | 103.63, 103.63, 49.29   |
| $\alpha, \beta, \gamma$ (°) | 90.000, 90.000, 120.000 |
| Wavelength (Å)              | 1.54187                 |
| Resolution (Å)              | 25.91~2.60 (2.64~2.60)  |
| Observed reflections        | 34065                   |
| Unique reflections          | 6039 (281)              |
| $R_{\text{sym}}$ (%)        | 0.14(0.83)              |
| $I/\sigma(I)$               | 14.5(2.4)               |
| Completeness (%)            | 99.9(100)               |
| Redundancy                  | 5.6(5.6)                |

---

| <b>Refinement</b>                |                      |
|----------------------------------|----------------------|
| Resolution Range (Å)             | 25.9~2.6 (3.27~2.60) |
| No. reflections                  | 6,026                |
| $R_{\text{work}}$ (%)            | 18.2                 |
| $R_{\text{free}}$ (%)            | 24.9                 |
| No. atoms                        |                      |
| protein                          | 1348                 |
| water                            | 50                   |
| B-factors (Å <sup>2</sup> )      |                      |
| protein                          | 34.3                 |
| water                            | 33.0                 |
| R.m.s. deviations                |                      |
| Bond lengths (Å)                 | 0.010                |
| Bond angles (°)                  | 1.146                |
| Ramachandran plot                |                      |
| Most favored and allowed regions | 100.0                |
| Disallowed regions               | 0                    |

---

Values in parentheses are for highest-resolution shell.
